# Supplementary material for: Chemotherapy and targeted therapy for advanced biliary tract cancers: an umbrella review
Source: Springer Nature journal article supplement (doi:10.1186/s12885-023-10679-8), 2023-04-25
Supplement: MOESM2 [file 25281178]

**Table S2.** Search terms utilized in the umbrella review.(Search date up to 09 April, 2022)

| <b>Databases searches</b>                                                                                                                                                                                                                                                                                                                                                                                                                                                           |                                                                         |                   |                     |                |
|-------------------------------------------------------------------------------------------------------------------------------------------------------------------------------------------------------------------------------------------------------------------------------------------------------------------------------------------------------------------------------------------------------------------------------------------------------------------------------------|-------------------------------------------------------------------------|-------------------|---------------------|----------------|
| <b>Terms 1</b>                                                                                                                                                                                                                                                                                                                                                                                                                                                                      | <b>Terms 2</b>                                                          | <b>Database</b>   | <b>Restrictions</b> | <b>Results</b> |
| “gallbladder cancer” OR “gallbladder carcinoma”<br>OR “gallbladder neoplasms” OR “gallbladder tumor” OR “gallbladder<br>neoplasm” OR “gallbladder mass” OR “gallbladder masses” OR “biliary<br>Cancer” OR “biliary tumor” OR “biliary neoplasms” OR “biliary neoplasm”<br>OR “biliary mass” OR “biliary masses” OR “cholangiocarcinoma”<br>OR “bile duct cancer” OR “bile duct tumor” OR “bile duct neoplasms” OR<br>“bile duct neoplasm” OR “bile duct mass” OR “bile duct masses” | meta-analysis OR<br>systematic review<br>OR systematic<br>overview      | PubMed            | All field           | 1268           |
| TS=(gallbladder cancer OR gallbladder carcinoma OR gallbladder neoplasms<br>OR gallbladder tumor OR gallbladder neoplasm OR gallbladder mass OR<br>gallbladder masses OR biliary Cancer OR biliary tumor OR biliary neoplasms<br>OR biliary neoplasm OR biliary mass OR biliary masses OR<br>cholangiocarcinoma OR bile duct cancer OR bile duct tumor OR bile duct<br>neoplasms OR bile duct neoplasm OR bile duct mass OR bile duct masses)                                       | TS=(meta-analysis<br>OR systematic<br>review OR<br>systematic overview) | Web Of<br>Science | Topic               | 1332           |

|                                                                                                                                                                                                                                                                                                                                                                                                                                  |                                                                  |                                                |                         |           |
|----------------------------------------------------------------------------------------------------------------------------------------------------------------------------------------------------------------------------------------------------------------------------------------------------------------------------------------------------------------------------------------------------------------------------------|------------------------------------------------------------------|------------------------------------------------|-------------------------|-----------|
| <p>gallbladder cancer OR gallbladder carcinoma OR gallbladder neoplasms OR gallbladder tumor OR gallbladder neoplasm OR gallbladder mass OR gallbladder masses OR biliary Cancer OR biliary tumor OR biliary neoplasms OR biliary neoplasm OR biliary mass OR biliary masses OR cholangiocarcinoma OR bile duct cancer OR bile duct tumor OR bile duct neoplasms OR bile duct neoplasm OR bile duct mass OR bile duct masses</p> | <p>meta-analysis OR systematic review OR systematic overview</p> | <p>Cochrane database of Systematic Reviews</p> | <p>Cochrane Reviews</p> | <p>52</p> |
| <p>Manual searches</p>                                                                                                                                                                                                                                                                                                                                                                                                           |                                                                  |                                                |                         |           |
| <p>[1] Ying J, Chen J. Combination versus mono-therapy as salvage treatment for advanced biliary tract cancer: A comprehensive meta-analysis of published data. Crit Rev Oncol Hematol. 2019. 139: 134-142.</p>                                                                                                                                                                                                                  |                                                                  |                                                |                         |           |
| <p>[2] Jiang Q, Huang J, Zhang B, et al. Efficacy and Safety of Anti-PD1/PDL1 in Advanced Biliary Tract Cancer: A Systematic Review and Meta-Analysis. Front Immunol. 2022. 13: 801909.</p>                                                                                                                                                                                                                                      |                                                                  |                                                |                         |           |
