# Supplementary material for: Chemotherapy and targeted therapy for advanced biliary tract cancers: an umbrella review
Source: Springer Nature journal article supplement (doi:10.1186/s12885-023-10679-8), 2023-04-25
Supplement: MOESM4 [file 25281178]

**Author(s):**  
**Question:** Gem-based+ anti-EGFR compared to Gem-based for Survival and Toxicity  
**Setting:**  
**Bibliography:**

| Certainty assessment                |                   |              |               |              |                      |                                                                          | N <sub>e</sub> of patients |                  | Effect                                    |                                                         | Certainty        | Importance |
|-------------------------------------|-------------------|--------------|---------------|--------------|----------------------|--------------------------------------------------------------------------|----------------------------|------------------|-------------------------------------------|---------------------------------------------------------|------------------|------------|
| N <sub>e</sub> of studies           | Study design      | Risk of bias | Inconsistency | Indirectness | Imprecision          | Other considerations                                                     | Gem-based+ anti-EGFR       | Gem-based        | Relative (95% CI)                         | Absolute (95% CI)                                       |                  |            |
| <b>OS</b>                           |                   |              |               |              |                      |                                                                          |                            |                  |                                           |                                                         |                  |            |
| 4                                   | randomised trials | serious      | not serious   | not serious  | not serious          | publication bias strongly suspected <sup>a</sup>                         | 228 participants           | 222 participants | <b>HR 0.82</b><br>(0.64 to 1.06)<br>[OS]  | -- per 1,000<br>(from -- to --)                         | ⊕⊕○○<br>Low      | CRITICAL   |
|                                     |                   |              |               |              |                      |                                                                          | -                          | 0.0%             |                                           | -- per 1,000<br>(from -- to --)                         |                  |            |
| <b>PFS</b>                          |                   |              |               |              |                      |                                                                          |                            |                  |                                           |                                                         |                  |            |
| 4                                   | randomised trials | serious      | not serious   | not serious  | not serious          | publication bias strongly suspected <sup>a</sup>                         | 228 participants           | 222 participants | <b>HR 0.88</b><br>(0.73 to 1.08)<br>[DFS] | -- per 1,000<br>(from -- to --)                         | ⊕⊕○○<br>Low      | CRITICAL   |
|                                     |                   |              |               |              |                      |                                                                          | -                          | 0.0%             |                                           | -- per 1,000<br>(from -- to --)                         |                  |            |
| <b>ORR</b>                          |                   |              |               |              |                      |                                                                          |                            |                  |                                           |                                                         |                  |            |
| 3                                   | randomised trials | serious      | not serious   | not serious  | serious <sup>b</sup> | publication bias strongly suspected <sup>a</sup>                         | 47/183 (25.7%)             | 34/178 (19.1%)   | <b>RR 1.34</b><br>(0.91 to 1.99)          | <b>65 more per 1,000</b><br>(from 17 fewer to 189 more) | ⊕○○○<br>Very low | CRITICAL   |
| <b>Toxicities--Neutropenia</b>      |                   |              |               |              |                      |                                                                          |                            |                  |                                           |                                                         |                  |            |
| 4                                   | randomised trials | serious      | not serious   | not serious  | not serious          | publication bias strongly suspected <sup>a</sup>                         | 34/228 (14.9%)             | 17/222 (7.7%)    | <b>RR 1.95</b><br>(1.13 to 3.36)          | <b>73 more per 1,000</b><br>(from 10 more to 181 more)  | ⊕⊕○○<br>Low      | IMPORTANT  |
| <b>Toxicities--Thrombocytopenia</b> |                   |              |               |              |                      |                                                                          |                            |                  |                                           |                                                         |                  |            |
| 4                                   | randomised trials | serious      | not serious   | not serious  | serious <sup>b</sup> | publication bias strongly suspected <sup>a</sup>                         | 28/228 (12.3%)             | 16/222 (7.2%)    | <b>RR 1.69</b><br>(0.99 to 2.87)          | <b>50 more per 1,000</b><br>(from 1 fewer to 135 more)  | ⊕○○○<br>Very low | IMPORTANT  |
| <b>Toxicities--Skin rash</b>        |                   |              |               |              |                      |                                                                          |                            |                  |                                           |                                                         |                  |            |
| 4                                   | randomised trials | serious      | not serious   | not serious  | serious <sup>c</sup> | publication bias strongly suspected very strong association <sup>a</sup> | 45/228 (19.7%)             | 1/222 (0.5%)     | <b>RR 18.11</b><br>(5.13 to 63.91)        | <b>77 more per 1,000</b><br>(from 19 more to 283 more)  | ⊕⊕⊕○<br>Moderate | IMPORTANT  |
| <b>Toxicities--Diarrhea</b>         |                   |              |               |              |                      |                                                                          |                            |                  |                                           |                                                         |                  |            |
| 4                                   | randomised trials | serious      | not serious   | not serious  | serious <sup>b</sup> | publication bias strongly suspected <sup>a</sup>                         | 24/228 (10.5%)             | 14/222 (6.3%)    | <b>RR 1.65</b><br>(0.89 to 3.04)          | <b>41 more per 1,000</b><br>(from 7 fewer to 129 more)  | ⊕○○○<br>Very low | IMPORTANT  |
| <b>Toxicities--Fatigue</b>          |                   |              |               |              |                      |                                                                          |                            |                  |                                           |                                                         |                  |            |
| 4                                   | randomised trials | serious      | not serious   | not serious  | serious <sup>b</sup> | publication bias strongly suspected <sup>a</sup>                         | 17/228 (7.5%)              | 8/222 (3.6%)     | <b>RR 2.01</b><br>(0.91 to 4.44)          | <b>36 more per 1,000</b><br>(from 3 fewer to 124 more)  | ⊕○○○<br>Very low | IMPORTANT  |

**CI:** confidence interval; **HR:** hazard Ratio; **RR:** risk ratio

**Explanations**

- a. No publication bias test was performed
- b. Sample size less than OIS
- c. The range of confidence interval is too large

**Author(s):**  
**Question:** GP compared to G for Survival  
**Setting:**  
**Bibliography:**

| Certainty assessment          |                   |              |               |              |             |                                                  | N <sub>e</sub> of patients |                  | Effect                                         |                                                           | Certainty   | Importance |
|-------------------------------|-------------------|--------------|---------------|--------------|-------------|--------------------------------------------------|----------------------------|------------------|------------------------------------------------|-----------------------------------------------------------|-------------|------------|
| N <sub>e</sub> of studies     | Study design      | Risk of bias | Inconsistency | Indirectness | Imprecision | Other considerations                             | GP                         | G                | Relative (95% CI)                              | Absolute (95% CI)                                         |             |            |
| <b>OS (assessed with: MD)</b> |                   |              |               |              |             |                                                  |                            |                  |                                                |                                                           |             |            |
| 2                             | randomised trials | serious      | not serious   | not serious  | not serious | publication bias strongly suspected <sup>a</sup> | 202                        | 184              | -                                              | MD <b>3.52 fewer</b><br>(5.14 fewer to 1.35 fewer)        | ⊕⊕○○<br>Low | CRITICAL   |
| <b>OS (assessed with: HR)</b> |                   |              |               |              |             |                                                  |                            |                  |                                                |                                                           |             |            |
| 2                             | randomised trials | serious      | not serious   | not serious  | not serious | publication bias strongly suspected <sup>a</sup> | 202 participants           | 184 participants | -<br><b>HR 0.65</b><br>(0.53 to 0.79)<br>[OS]  | -- per 1,000<br>(from -- to --)                           | ⊕⊕○○<br>Low | CRITICAL   |
|                               |                   |              |               |              |             |                                                  | -                          | 0.0%             |                                                | -- per 1,000<br>(from -- to --)                           |             |            |
| <b>PFS</b>                    |                   |              |               |              |             |                                                  |                            |                  |                                                |                                                           |             |            |
| 2                             | randomised trials | serious      | not serious   | not serious  | not serious | publication bias strongly suspected <sup>a</sup> | 202                        | 184              | -                                              | MD <b>2.6 lower</b><br>(3.81 lower to 1.4 lower)          | ⊕⊕○○<br>Low | CRITICAL   |
| <b>PFS</b>                    |                   |              |               |              |             |                                                  |                            |                  |                                                |                                                           |             |            |
| 2                             | randomised trials | serious      | not serious   | not serious  | not serious | publication bias strongly suspected <sup>a</sup> | 202 participants           | 184 participants | -<br><b>HR 0.63</b><br>(0.52 to 0.76)<br>[PFS] | -- per 1,000<br>(from -- to --)                           | ⊕⊕○○<br>Low | CRITICAL   |
|                               |                   |              |               |              |             |                                                  | -                          | 0.0%             |                                                | -- per 1,000<br>(from -- to --)                           |             |            |
| <b>ORR</b>                    |                   |              |               |              |             |                                                  |                            |                  |                                                |                                                           |             |            |
| 2                             | randomised trials | serious      | not serious   | not serious  | not serious | publication bias strongly suspected <sup>a</sup> | 27/184 (14.7%)             | 50/202 (24.8%)   | <b>OR 0.53</b><br>(0.31 to 0.88)               | <b>99 fewer per 1,000</b><br>(from 155 fewer to 23 fewer) | ⊕⊕○○<br>Low | CRITICAL   |

CI: confidence interval; HR: hazard Ratio; MD: mean difference; OR: odds ratio

**Explanations**

a. No publication bias test was performed

**Author(s):**  
**Question:** GP+anti-EGFR compared to GP for Survival  
**Setting:**  
**Bibliography:**

| Certainty assessment      |                   |              |               |              |             |                                                  | N <sub>e</sub> of patients |                  | Effect                                    |                                                           | Certainty   | Importance |
|---------------------------|-------------------|--------------|---------------|--------------|-------------|--------------------------------------------------|----------------------------|------------------|-------------------------------------------|-----------------------------------------------------------|-------------|------------|
| N <sub>e</sub> of studies | Study design      | Risk of bias | Inconsistency | Indirectness | Imprecision | Other considerations                             | GP+anti-EGFR               | GP               | Relative (95% CI)                         | Absolute (95% CI)                                         |             |            |
| <b>OS</b>                 |                   |              |               |              |             |                                                  |                            |                  |                                           |                                                           |             |            |
| 4                         | randomised trials | serious      | not serious   | not serious  | not serious | publication bias strongly suspected <sup>a</sup> | 316                        | 313              | -                                         | MD <b>1.49 lower</b><br>(2.56 lower to 0.43 lower)        | ⊕⊕○○<br>Low | CRITICAL   |
| <b>OS</b>                 |                   |              |               |              |             |                                                  |                            |                  |                                           |                                                           |             |            |
| 4                         | randomised trials | serious      | not serious   | not serious  | not serious | publication bias strongly suspected <sup>a</sup> | 316 participants           | 313 participants | <b>HR 0.90</b><br>(0.70 to 1.15)<br>[OS]  | -- per 1,000<br>(from -- to --)                           | ⊕⊕○○<br>Low | CRITICAL   |
|                           |                   |              |               |              |             |                                                  | -                          | 0.0%             |                                           | -- per 1,000<br>(from -- to --)                           |             |            |
| <b>PFS</b>                |                   |              |               |              |             |                                                  |                            |                  |                                           |                                                           |             |            |
| 4                         | randomised trials | serious      | not serious   | not serious  | not serious | publication bias strongly suspected <sup>a</sup> | 316                        | 313              | -                                         | MD <b>0.07 lower</b><br>(1.91 lower to 1.77 higher)       | ⊕⊕○○<br>Low | CRITICAL   |
| <b>PFS</b>                |                   |              |               |              |             |                                                  |                            |                  |                                           |                                                           |             |            |
| 4                         | randomised trials | serious      | not serious   | not serious  | not serious | publication bias strongly suspected <sup>a</sup> | 316 participants           | 313 participants | <b>HR 0.79</b><br>(0.63 to 0.99)<br>[PFS] | -- per 1,000<br>(from -- to --)                           | ⊕⊕○○<br>Low | CRITICAL   |
|                           |                   |              |               |              |             |                                                  | -                          | 0.0%             |                                           | -- per 1,000<br>(from -- to --)                           |             |            |
| <b>ORR</b>                |                   |              |               |              |             |                                                  |                            |                  |                                           |                                                           |             |            |
| 4                         | randomised trials | serious      | not serious   | not serious  | not serious | publication bias strongly suspected <sup>a</sup> | 87/316 (27.5%)             | 55/313 (17.6%)   | <b>OR 0.56</b><br>(0.38 to 0.83)          | <b>69 fewer per 1,000</b><br>(from 101 fewer to 25 fewer) | ⊕⊕○○<br>Low | CRITICAL   |

CI: confidence interval; HR: hazard Ratio; MD: mean difference; OR: odds ratio

**Explanations**

a. No publication bias test was performed

**Author(s):**  
**Question:** FP compared to GP for Survival and Toxicity  
**Setting:**  
**Bibliography:**

| Certainty assessment               |                        |              |                      |              |             |                                                  | N <sub>e</sub> of patients |                  | Effect                                    |                                                       | Certainty        | Importance |
|------------------------------------|------------------------|--------------|----------------------|--------------|-------------|--------------------------------------------------|----------------------------|------------------|-------------------------------------------|-------------------------------------------------------|------------------|------------|
| N <sub>e</sub> of studies          | Study design           | Risk of bias | Inconsistency        | Indirectness | Imprecision | Other considerations                             | FP                         | GP               | Relative (95% CI)                         | Absolute (95% CI)                                     |                  |            |
| <b>ORR</b>                         |                        |              |                      |              |             |                                                  |                            |                  |                                           |                                                       |                  |            |
| 5                                  | observational studies  | serious      | not serious          | not serious  | not serious | none                                             | -/311                      | -/416            | <b>RR 1.13</b><br>(0.80 to 1.58)          | <b>0 fewer per 1,000</b><br>(from 0 fewer to 0 fewer) | ⊕○○○<br>Very low | CRITICAL   |
| <b>DCR</b>                         |                        |              |                      |              |             |                                                  |                            |                  |                                           |                                                       |                  |            |
| 5                                  | observational studies  | serious      | not serious          | not serious  | not serious | none                                             | -/311                      | -/416            | <b>RR 1.02</b><br>(0.91 to 1.13)          | <b>0 fewer per 1,000</b><br>(from 0 fewer to 0 fewer) | ⊕○○○<br>Very low | CRITICAL   |
| <b>PFS</b>                         |                        |              |                      |              |             |                                                  |                            |                  |                                           |                                                       |                  |            |
| 4                                  | non-randomised studies | serious      | not serious          | not serious  | not serious | publication bias strongly suspected <sup>a</sup> | 233 participants           | 360 participants | <b>HR 0.95</b><br>(0.86 to 1.05)<br>[PFS] | -- per 1,000<br>(from -- to --)                       | ⊕⊕○○<br>Low      | CRITICAL   |
|                                    |                        |              |                      |              |             |                                                  | -                          | 0.0%             |                                           | -- per 1,000<br>(from -- to --)                       |                  |            |
| <b>OS</b>                          |                        |              |                      |              |             |                                                  |                            |                  |                                           |                                                       |                  |            |
| 4                                  | non-randomised studies | serious      | not serious          | not serious  | not serious | publication bias strongly suspected <sup>a</sup> | 233 participants           | 360 participants | <b>HR 1.06</b><br>(0.98 to 1.14)<br>[OS]  | -- per 1,000<br>(from -- to --)                       | ⊕⊕○○<br>Low      | CRITICAL   |
|                                    |                        |              |                      |              |             |                                                  | -                          | 0.0%             |                                           | -- per 1,000<br>(from -- to --)                       |                  |            |
| <b>Toxicities--Neutropenia</b>     |                        |              |                      |              |             |                                                  |                            |                  |                                           |                                                       |                  |            |
| 4                                  | observational studies  | serious      | serious <sup>b</sup> | not serious  | not serious | publication bias strongly suspected <sup>a</sup> | -/233                      | -/360            | not estimable                             |                                                       | ⊕○○○<br>Very low | IMPORTANT  |
| <b>Toxicities--Anemia</b>          |                        |              |                      |              |             |                                                  |                            |                  |                                           |                                                       |                  |            |
| 4                                  | observational studies  | serious      | serious <sup>b</sup> | not serious  | not serious | publication bias strongly suspected <sup>a</sup> | -/233                      | -/360            | not estimable                             |                                                       | ⊕○○○<br>Very low | IMPORTANT  |
| <b>Toxicities--Trombocytopenia</b> |                        |              |                      |              |             |                                                  |                            |                  |                                           |                                                       |                  |            |
| 4                                  | observational studies  | serious      | serious <sup>b</sup> | not serious  | not serious | publication bias strongly suspected <sup>a</sup> | -/233                      | -/360            | not estimable                             |                                                       | ⊕○○○<br>Very low | IMPORTANT  |
| <b>Toxicities--Nausea/Vomiting</b> |                        |              |                      |              |             |                                                  |                            |                  |                                           |                                                       |                  |            |
| 4                                  | observational studies  | serious      | not serious          | not serious  | not serious | publication bias strongly suspected <sup>a</sup> | -/233                      | -/360            | not estimable                             |                                                       | ⊕○○○<br>Very low | IMPORTANT  |
| <b>Toxicities--Anorexia</b>        |                        |              |                      |              |             |                                                  |                            |                  |                                           |                                                       |                  |            |
| 4                                  | observational studies  | serious      | serious <sup>b</sup> | not serious  | not serious | publication bias strongly suspected <sup>a</sup> | -/233                      | -/360            | not estimable                             |                                                       | ⊕○○○<br>Very low | IMPORTANT  |
| <b>Toxicities--Nephropathy</b>     |                        |              |                      |              |             |                                                  |                            |                  |                                           |                                                       |                  |            |
| 4                                  | observational studies  | serious      | serious <sup>b</sup> | not serious  | not serious | publication bias strongly suspected <sup>a</sup> | -/233                      | -/360            | not estimable                             |                                                       | ⊕○○○<br>Very low | IMPORTANT  |
| <b>Toxicities--Neuropathy</b>      |                        |              |                      |              |             |                                                  |                            |                  |                                           |                                                       |                  |            |
| 4                                  | observational studies  | serious      | serious <sup>b</sup> | not serious  | not serious | publication bias strongly suspected <sup>a</sup> | -/233                      | -/360            | not estimable                             |                                                       | ⊕○○○<br>Very low | IMPORTANT  |

CI: confidence interval; HR: hazard Ratio; RR: risk ratio

**Explanations**

- a. There was no publication bias test for this conclusion
- b. The heterogeneity between the included studies was large

**Author(s):**  
**Question:** G-based+anti-EGFR compared to G-based for Toxicities  
**Setting:**  
**Bibliography:**

| Certainty assessment                     |                   |              |               |              |                      |                                                  | N <sub>e</sub> of patients |                | Effect                           |                                                         | Certainty        | Importance |
|------------------------------------------|-------------------|--------------|---------------|--------------|----------------------|--------------------------------------------------|----------------------------|----------------|----------------------------------|---------------------------------------------------------|------------------|------------|
| N <sub>e</sub> of studies                | Study design      | Risk of bias | Inconsistency | Indirectness | Imprecision          | Other considerations                             | G-based+anti-EGFR          | G-based        | Relative (95% CI)                | Absolute (95% CI)                                       |                  |            |
| <b>Toxicities--Neutropenia</b>           |                   |              |               |              |                      |                                                  |                            |                |                                  |                                                         |                  |            |
| 6                                        | randomised trials | serious      | not serious   | not serious  | serious <sup>a</sup> | publication bias strongly suspected <sup>b</sup> | 62/429 (14.5%)             | 47/413 (11.4%) | <b>OR 1.37</b><br>(0.89 to 2.12) | <b>36 more per 1,000</b><br>(from 11 fewer to 100 more) | ⊕○○○<br>Very low | IMPORTANT  |
| <b>Toxicities--Thrombocytopenia</b>      |                   |              |               |              |                      |                                                  |                            |                |                                  |                                                         |                  |            |
| 6                                        | randomised trials | serious      | not serious   | not serious  | serious <sup>a</sup> | publication bias strongly suspected <sup>b</sup> | 36/429 (8.4%)              | 25/413 (6.1%)  | <b>OR 1.40</b><br>(0.83 to 2.39) | <b>22 more per 1,000</b><br>(from 10 fewer to 73 more)  | ⊕○○○<br>Very low | IMPORTANT  |
| <b>Toxicities--Anemia</b>                |                   |              |               |              |                      |                                                  |                            |                |                                  |                                                         |                  |            |
| 4                                        | randomised trials | serious      | not serious   | not serious  | serious <sup>a</sup> | publication bias strongly suspected <sup>b</sup> | 21/232 (9.1%)              | 17/223 (7.6%)  | <b>OR 1.21</b><br>(0.62 to 2.38) | <b>15 more per 1,000</b><br>(from 28 fewer to 88 more)  | ⊕○○○<br>Very low | IMPORTANT  |
| <b>Toxicities--Peripheral neuropathy</b> |                   |              |               |              |                      |                                                  |                            |                |                                  |                                                         |                  |            |
| 5                                        | randomised trials | serious      | not serious   | not serious  | serious <sup>a</sup> | publication bias strongly suspected <sup>b</sup> | 27/380 (7.1%)              | 17/365 (4.7%)  | <b>OR 1.52</b><br>(0.81 to 2.88) | <b>23 more per 1,000</b><br>(from 9 fewer to 77 more)   | ⊕○○○<br>Very low | IMPORTANT  |
| <b>Toxicities--Increased AST/ALT</b>     |                   |              |               |              |                      |                                                  |                            |                |                                  |                                                         |                  |            |
| 5                                        | randomised trials | serious      | not serious   | not serious  | serious <sup>a</sup> | publication bias strongly suspected <sup>b</sup> | 37/380 (9.7%)              | 26/365 (7.1%)  | <b>OR 1.65</b><br>(0.96 to 2.84) | <b>41 more per 1,000</b><br>(from 3 fewer to 108 more)  | ⊕○○○<br>Very low | IMPORTANT  |

CI: confidence interval; OR: odds ratio

**Explanations**

- a. Sample size less than OIS
- b. No publication bias test was performed

**Author(s):**  
**Question:** G-based compared to non-G-based for Survival and Toxicities  
**Setting:**  
**Bibliography:**

| Certainty assessment                |                   |              |                      |              |                      |                                                                             | N <sub>e</sub> of patients |                  | Effect                                    |                                                          | Certainty        | Importance |
|-------------------------------------|-------------------|--------------|----------------------|--------------|----------------------|-----------------------------------------------------------------------------|----------------------------|------------------|-------------------------------------------|----------------------------------------------------------|------------------|------------|
| N <sub>e</sub> of studies           | Study design      | Risk of bias | Inconsistency        | Indirectness | Imprecision          | Other considerations                                                        | G-based                    | non-G-based      | Relative (95% CI)                         | Absolute (95% CI)                                        |                  |            |
| <b>DRR</b>                          |                   |              |                      |              |                      |                                                                             |                            |                  |                                           |                                                          |                  |            |
| 4                                   | randomised trials | serious      | not serious          | not serious  | serious <sup>a</sup> | none                                                                        | 139 participants           | 141 participants | <b>OR 1.39</b><br>(0.81 to 2.40)<br>[DRR] | <b>0 fewer per 1,000</b><br>(from 0 fewer to 0 fewer)    | ⊕⊕○○<br>Low      | CRITICAL   |
|                                     |                   |              |                      |              |                      |                                                                             | -                          | 0.0%             |                                           |                                                          |                  |            |
| <b>DCR</b>                          |                   |              |                      |              |                      |                                                                             |                            |                  |                                           |                                                          |                  |            |
| 4                                   | randomised trials | serious      | serious <sup>b</sup> | not serious  | serious <sup>a</sup> | none                                                                        | 139 participants           | 141 participants | <b>OR 1.48</b><br>(0.43 to 5.07)<br>[DCR] | <b>0 fewer per 1,000</b><br>(from 0 fewer to 0 fewer)    | ⊕○○○<br>Very low | CRITICAL   |
|                                     |                   |              |                      |              |                      |                                                                             | -                          | 0.0%             |                                           |                                                          |                  |            |
| <b>PFS</b>                          |                   |              |                      |              |                      |                                                                             |                            |                  |                                           |                                                          |                  |            |
| 4                                   | randomised trials | serious      | serious <sup>b</sup> | not serious  | not serious          | none                                                                        | 139 participants           | 141 participants | not estimable                             |                                                          | ⊕⊕○○<br>Low      | CRITICAL   |
|                                     |                   |              |                      |              |                      |                                                                             | -                          | 0.0%             |                                           |                                                          |                  |            |
| <b>OS</b>                           |                   |              |                      |              |                      |                                                                             |                            |                  |                                           |                                                          |                  |            |
| 4                                   | randomised trials | serious      | serious <sup>b</sup> | not serious  | not serious          | none                                                                        | 139 participants           | 141 participants | not estimable                             |                                                          | ⊕⊕○○<br>Low      | CRITICAL   |
|                                     |                   |              |                      |              |                      |                                                                             | -                          | 0.0%             |                                           |                                                          |                  |            |
| <b>Toxicities--Leukopenia</b>       |                   |              |                      |              |                      |                                                                             |                            |                  |                                           |                                                          |                  |            |
| 4                                   | randomised trials | serious      | serious <sup>b</sup> | not serious  | not serious          | publication bias strongly suspected<br>very strong association <sup>c</sup> | 41/148 (27.7%)             | 7/151 (4.6%)     | <b>OR 7.17</b><br>(1.43 to 36.08)         | <b>212 more per 1,000</b><br>(from 19 more to 591 more)  | ⊕⊕⊕○<br>Moderate | IMPORTANT  |
| <b>Toxicities--Anemia</b>           |                   |              |                      |              |                      |                                                                             |                            |                  |                                           |                                                          |                  |            |
| 3                                   | randomised trials | serious      | not serious          | not serious  | not serious          | publication bias strongly suspected<br>very strong association <sup>c</sup> | 27/148 (18.2%)             | 5/151 (3.3%)     | <b>OR 7.04</b><br>(2.59 to 19.12)         | <b>161 more per 1,000</b><br>(from 48 more to 363 more)  | ⊕⊕⊕⊕<br>High     | IMPORTANT  |
| <b>Toxicities--Neutropenia</b>      |                   |              |                      |              |                      |                                                                             |                            |                  |                                           |                                                          |                  |            |
| 4                                   | randomised trials | serious      | serious <sup>b</sup> | not serious  | serious <sup>d</sup> | publication bias strongly suspected <sup>c</sup>                            | 68/148 (45.9%)             | 23/151 (15.2%)   | <b>OR 4.63</b><br>(0.95 to 22.50)         | <b>302 more per 1,000</b><br>(from 7 fewer to 649 more)  | ⊕○○○<br>Very low | IMPORTANT  |
| <b>Toxicities--Thrombocytopenia</b> |                   |              |                      |              |                      |                                                                             |                            |                  |                                           |                                                          |                  |            |
| 4                                   | randomised trials | serious      | serious <sup>b</sup> | not serious  | serious <sup>d</sup> | publication bias strongly suspected <sup>c</sup>                            | 30/148 (20.3%)             | 13/151 (8.6%)    | <b>OR 2.79</b><br>(0.66 to 11.81)         | <b>122 more per 1,000</b><br>(from 28 fewer to 441 more) | ⊕○○○<br>Very low | IMPORTANT  |
| <b>New outcome</b>                  |                   |              |                      |              |                      |                                                                             |                            |                  |                                           |                                                          |                  |            |
| 4                                   | randomised trials | serious      | not serious          | not serious  | serious <sup>a</sup> | publication bias strongly suspected <sup>c</sup>                            | 21/148 (14.2%)             | 20/151 (13.2%)   | <b>OR 1.11</b><br>(0.56 to 2.23)          | <b>12 more per 1,000</b><br>(from 54 fewer to 122 more)  | ⊕○○○<br>Very low | IMPORTANT  |

CI: confidence interval; OR: odds ratio

**Explanations**

- a. Sample size less than OIS
- b. The heterogeneity between the included studies was large
- c. There was no publication bias test for this conclusion
- d. The sample size meets the OIS standard, but the 95% confidence interval contains invalid values

**Author(s):**  
**Question:** G-based compared to G for Toxicities  
**Setting:**  
**Bibliography:**

| Certainty assessment                    |                   |              |                      |              |                      |                                                  | N <sub>e</sub> of patients |                | Effect                           |                                                         | Certainty        | Importance |
|-----------------------------------------|-------------------|--------------|----------------------|--------------|----------------------|--------------------------------------------------|----------------------------|----------------|----------------------------------|---------------------------------------------------------|------------------|------------|
| N <sub>e</sub> of studies               | Study design      | Risk of bias | Inconsistency        | Indirectness | Imprecision          | Other considerations                             | G-based                    | G              | Relative (95% CI)                | Absolute (95% CI)                                       |                  |            |
| <b>Toxicities--Leukopenia</b>           |                   |              |                      |              |                      |                                                  |                            |                |                                  |                                                         |                  |            |
| 3                                       | randomised trials | serious      | not serious          | not serious  | not serious          | publication bias strongly suspected <sup>a</sup> | 53/269 (19.7%)             | 33/273 (12.1%) | <b>OR 1.82</b><br>(1.13 to 2.94) | <b>79 more per 1,000</b><br>(from 14 more to 167 more)  | ⊕⊕○○<br>Low      | IMPORTANT  |
| <b>Toxicities--Anemia</b>               |                   |              |                      |              |                      |                                                  |                            |                |                                  |                                                         |                  |            |
| 3                                       | randomised trials | serious      | serious <sup>b</sup> | not serious  | not serious          | publication bias strongly suspected <sup>a</sup> | 33/269 (12.3%)             | 19/273 (7.0%)  | <b>OR 1.96</b><br>(1.07 to 3.62) | <b>58 more per 1,000</b><br>(from 5 more to 143 more)   | ⊕○○○<br>Very low | IMPORTANT  |
| <b>Toxicities--Neutropenia</b>          |                   |              |                      |              |                      |                                                  |                            |                |                                  |                                                         |                  |            |
| 3                                       | randomised trials | serious      | not serious          | not serious  | not serious          | publication bias strongly suspected <sup>a</sup> | 83/269 (30.9%)             | 56/273 (20.5%) | <b>OR 1.78</b><br>(1.19 to 2.66) | <b>110 more per 1,000</b><br>(from 30 more to 202 more) | ⊕⊕○○<br>Low      | IMPORTANT  |
| <b>Toxicities--Thrombocytopenia</b>     |                   |              |                      |              |                      |                                                  |                            |                |                                  |                                                         |                  |            |
| 3                                       | randomised trials | serious      | not serious          | not serious  | serious <sup>c</sup> | publication bias strongly suspected <sup>a</sup> | 22/269 (8.2%)              | 20/273 (7.3%)  | <b>OR 1.13</b><br>(0.60 to 2.14) | <b>9 more per 1,000</b><br>(from 28 fewer to 71 more)   | ⊕○○○<br>Very low | IMPORTANT  |
| <b>Toxicities-- Increased ALT level</b> |                   |              |                      |              |                      |                                                  |                            |                |                                  |                                                         |                  |            |
| 3                                       | randomised trials | serious      | serious <sup>b</sup> | not serious  | serious <sup>c</sup> | publication bias strongly suspected <sup>a</sup> | 32/269 (11.9%)             | 41/273 (15.0%) | <b>OR 0.76</b><br>(0.47 to 1.25) | <b>32 fewer per 1,000</b><br>(from 73 fewer to 31 more) | ⊕○○○<br>Very low | IMPORTANT  |

CI: confidence interval; OR: odds ratio

**Explanations**

- a. There was no publication bias test for this conclusion
- b. The heterogeneity between the included studies was large
- c. Sample size less than OIS



**Author(s):**  
**Question:** G-based+anti-VEGFR/EGFR compared to G-based for Toxicities  
**Setting:**  
**Bibliography:**

| Certainty assessment         |                   |              |               |              |                      |                                                                     | N <sub>e</sub> of patients |               | Effect                           |                                                         | Certainty        | Importance |
|------------------------------|-------------------|--------------|---------------|--------------|----------------------|---------------------------------------------------------------------|----------------------------|---------------|----------------------------------|---------------------------------------------------------|------------------|------------|
| N <sub>e</sub> of studies    | Study design      | Risk of bias | Inconsistency | Indirectness | Imprecision          | Other considerations                                                | G-based+anti-VEGFR/EGFR    | G-based       | Relative (95% CI)                | Absolute (95% CI)                                       |                  |            |
| <b>Toxicities-- Nausea</b>   |                   |              |               |              |                      |                                                                     |                            |               |                                  |                                                         |                  |            |
| 6                            | randomised trials | serious      | not serious   | not serious  | serious <sup>a</sup> | publication bias strongly suspected <sup>b</sup>                    | 12/408 (2.9%)              | 12/403 (3.0%) | <b>RR 1.01</b><br>(0.41 to 2.47) | <b>0 fewer per 1,000</b><br>(from 18 fewer to 44 more)  | ⊕○○○<br>Very low | IMPORTANT  |
| <b>Toxicities-- Vomiting</b> |                   |              |               |              |                      |                                                                     |                            |               |                                  |                                                         |                  |            |
| 6                            | randomised trials | serious      | not serious   | not serious  | serious <sup>a</sup> | publication bias strongly suspected <sup>b</sup>                    | 11/346 (3.2%)              | 17/343 (5.0%) | <b>RR 0.71</b><br>(0.31 to 1.60) | <b>14 fewer per 1,000</b><br>(from 34 fewer to 30 more) | ⊕○○○<br>Very low | IMPORTANT  |
| <b>Toxicities-- Diarrhea</b> |                   |              |               |              |                      |                                                                     |                            |               |                                  |                                                         |                  |            |
| 6                            | randomised trials | serious      | not serious   | not serious  | not serious          | publication bias strongly suspected strong association <sup>b</sup> | 28/408 (6.9%)              | 11/403 (2.7%) | <b>RR 2.48</b><br>(1.20 to 5.10) | <b>40 more per 1,000</b><br>(from 5 more to 112 more)   | ⊕⊕⊕○<br>Moderate | IMPORTANT  |

**CI:** confidence interval; **RR:** risk ratio

**Explanations**

- a. Sample size less than OIS
- b. There was no publication bias test for this conclusion

**Author(s):**  
**Question:** Fluoropyrimidine-based doublet CHT compared to ASC or 5-FU/LV for Survival  
**Setting:**  
**Bibliography:**

| Certainty assessment      |                   |              |                      |              |             |                                                                          | N <sub>e</sub> of patients         |                  | Effect                                       |                                                           | Certainty        | Importance |
|---------------------------|-------------------|--------------|----------------------|--------------|-------------|--------------------------------------------------------------------------|------------------------------------|------------------|----------------------------------------------|-----------------------------------------------------------|------------------|------------|
| N <sub>e</sub> of studies | Study design      | Risk of bias | Inconsistency        | Indirectness | Imprecision | Other considerations                                                     | Fluoropyrimidine-based doublet CHT | ASC or 5-FU/LV   | Relative (95% CI)                            | Absolute (95% CI)                                         |                  |            |
| <b>OS</b>                 |                   |              |                      |              |             |                                                                          |                                    |                  |                                              |                                                           |                  |            |
| 2                         | randomised trials | serious      | not serious          | not serious  | not serious | publication bias strongly suspected <sup>a</sup>                         | 169 participants                   | 167 participants | <b>HR 0.63</b><br>(0.49 to 0.80)<br>[OS]     | -- per 1,000<br>(from -- to --)                           | ⊕⊕○○<br>Low      |            |
|                           |                   |              |                      |              |             |                                                                          | -                                  | 0.0%             |                                              | -- per 1,000<br>(from -- to --)                           |                  |            |
| <b>DCR</b>                |                   |              |                      |              |             |                                                                          |                                    |                  |                                              |                                                           |                  |            |
| 2                         | randomised trials | serious      | serious <sup>b</sup> | not serious  | not serious | publication bias strongly suspected very strong association <sup>a</sup> | 169 participants                   | 167 participants | <b>OR 13.29</b><br>(0.39 to 456.18)<br>[DCR] | <b>0 fewer per 1,000</b><br>(from 0 fewer to 0 fewer)     | ⊕⊕⊕○<br>Moderate |            |
|                           |                   |              |                      |              |             |                                                                          | -                                  | 0.0%             |                                              | <b>0 fewer per 1,000</b><br>(from 0 fewer to 0 fewer)     |                  |            |
|                           |                   |              |                      |              |             |                                                                          | -                                  | 34.9%            |                                              | <b>528 more per 1,000</b><br>(from 176 fewer to 647 more) |                  |            |
| <b>ORR</b>                |                   |              |                      |              |             |                                                                          |                                    |                  |                                              |                                                           |                  |            |
| 2                         | randomised trials | serious      | not serious          | not serious  | not serious | publication bias strongly suspected strong association <sup>a</sup>      | 169 participants                   | 167 participants | <b>OR 3.24</b><br>(1.18 to 8.92)<br>[ORR]    | <b>0 fewer per 1,000</b><br>(from 0 fewer to 0 fewer)     | ⊕⊕⊕○<br>Moderate |            |
|                           |                   |              |                      |              |             |                                                                          | -                                  | 0.0%             |                                              | <b>0 fewer per 1,000</b><br>(from 0 fewer to 0 fewer)     |                  |            |
|                           |                   |              |                      |              |             |                                                                          | -                                  | 5.8%             |                                              | <b>108 more per 1,000</b><br>(from 10 more to 297 more)   |                  |            |

CI: confidence interval; HR: hazard Ratio; OR: odds ratio

**Explanations**

- a. There was no publication bias test for this conclusion
- b. The heterogeneity between the included studies was large

**Author(s):**  
**Question:** Fluoropyrimidine-based compared to Observation for Survival  
**Setting:**  
**Bibliography:**

| Certainty assessment      |                   |              |               |              |             |                      | N <sub>e</sub> of patients |                  | Effect                                   |                                 | Certainty        | Importance |
|---------------------------|-------------------|--------------|---------------|--------------|-------------|----------------------|----------------------------|------------------|------------------------------------------|---------------------------------|------------------|------------|
| N <sub>e</sub> of studies | Study design      | Risk of bias | Inconsistency | Indirectness | Imprecision | Other considerations | Fluoropyrimidine-based     | Observation      | Relative (95% CI)                        | Absolute (95% CI)               |                  |            |
| <b>OS</b>                 |                   |              |               |              |             |                      |                            |                  |                                          |                                 |                  |            |
| 4                         | randomised trials | serious      | not serious   | not serious  | not serious | none                 | 381 participants           | 358 participants | <b>HR 0.83</b><br>(0.70 to 0.99)<br>[OS] | -- per 1,000<br>(from -- to --) | ⊕⊕⊕○<br>Moderate | IMPORTANT  |
|                           |                   |              |               |              |             |                      | -                          | 0.0%             |                                          | -- per 1,000<br>(from -- to --) |                  |            |

**CI:** confidence interval; **HR:** hazard Ratio

**Author(s):**  
**Question:** G-based compared to Observation for Survival  
**Setting:**  
**Bibliography:**

| Certainty assessment      |                   |              |               |              |             |                      | N <sub>e</sub> of patients |                  | Effect                                   |                                 | Certainty        | Importance |
|---------------------------|-------------------|--------------|---------------|--------------|-------------|----------------------|----------------------------|------------------|------------------------------------------|---------------------------------|------------------|------------|
| N <sub>e</sub> of studies | Study design      | Risk of bias | Inconsistency | Indirectness | Imprecision | Other considerations | G-based                    | Observation      | Relative (95% CI)                        | Absolute (95% CI)               |                  |            |
| <b>OS</b>                 |                   |              |               |              |             |                      |                            |                  |                                          |                                 |                  |            |
| 3                         | randomised trials | serious      | not serious   | not serious  | not serious | none                 | 246 participants           | 238 participants | <b>HR 0.91</b><br>(0.74 to 1.12)<br>[OS] | -- per 1,000<br>(from -- to --) | ⊕⊕⊕○<br>Moderate | IMPORTANT  |
|                           |                   |              |               |              |             |                      | -                          | 0.0%             |                                          | -- per 1,000<br>(from -- to --) |                  |            |

**CI:** confidence interval; **HR:** hazard Ratio

**Author(s):**  
**Question:** G-based compared to Observation for Survival  
**Setting:**  
**Bibliography:**

| Certainty assessment             |                   |              |               |              |             |                                                  | N <sub>e</sub> of patients |                  | Effect                                                          |                                 | Certainty   | Importance |
|----------------------------------|-------------------|--------------|---------------|--------------|-------------|--------------------------------------------------|----------------------------|------------------|-----------------------------------------------------------------|---------------------------------|-------------|------------|
| N <sub>e</sub> of studies        | Study design      | Risk of bias | Inconsistency | Indirectness | Imprecision | Other considerations                             | G-based                    | Observation      | Relative (95% CI)                                               | Absolute (95% CI)               |             |            |
| <b>RFS-All Patients</b>          |                   |              |               |              |             |                                                  |                            |                  |                                                                 |                                 |             |            |
| 2                                | randomised trials | serious      | not serious   | not serious  | not serious | publication bias strongly suspected <sup>a</sup> | 212 participants           | 207 participants | <b>HR 0.91</b><br>(0.71 to 1.16)<br>[RFS-All Patients]          | -- per 1,000<br>(from -- to --) | ⊕⊕○○<br>Low | CRITICAL   |
|                                  |                   |              |               |              |             |                                                  | -                          | 0.0%             |                                                                 | -- per 1,000<br>(from -- to --) |             |            |
| <b>RFS-R1 resection Patients</b> |                   |              |               |              |             |                                                  |                            |                  |                                                                 |                                 |             |            |
| 2                                | randomised trials | serious      | not serious   | not serious  | not serious | publication bias strongly suspected <sup>a</sup> | 212 participants           | 207 participants | <b>HR 1.10</b><br>(0.58 to 2.07)<br>[RFS-R1 resection Patients] | -- per 1,000<br>(from -- to --) | ⊕⊕○○<br>Low | CRITICAL   |
|                                  |                   |              |               |              |             |                                                  | -                          | 0.0%             |                                                                 | -- per 1,000<br>(from -- to --) |             |            |
| <b>RFS-N+ tumor Patients</b>     |                   |              |               |              |             |                                                  |                            |                  |                                                                 |                                 |             |            |
| 2                                | randomised trials | serious      | not serious   | not serious  | not serious | publication bias strongly suspected <sup>a</sup> | 212 participants           | 207 participants | <b>HR 0.86</b><br>(0.60 to 1.23)<br>[RFS-N+ tumor Patients]     | -- per 1,000<br>(from -- to --) | ⊕⊕○○<br>Low | CRITICAL   |
|                                  |                   |              |               |              |             |                                                  | -                          | 0.0%             |                                                                 | -- per 1,000<br>(from -- to --) |             |            |
| <b>OS-All Patients</b>           |                   |              |               |              |             |                                                  |                            |                  |                                                                 |                                 |             |            |
| 2                                | randomised trials | serious      | not serious   | not serious  | not serious | publication bias strongly suspected <sup>a</sup> | 212 participants           | 207 participants | <b>HR 1.03</b><br>(0.78 to 1.35)<br>[OS-All Patients]           | -- per 1,000<br>(from -- to --) | ⊕⊕○○<br>Low | CRITICAL   |
|                                  |                   |              |               |              |             |                                                  | -                          | 0.0%             |                                                                 | -- per 1,000<br>(from -- to --) |             |            |
| <b>OS-R1 resection Patients</b>  |                   |              |               |              |             |                                                  |                            |                  |                                                                 |                                 |             |            |
| 2                                | randomised trials | serious      | not serious   | not serious  | not serious | publication bias strongly suspected <sup>a</sup> | 212 participants           | 207 participants | <b>HR 1.25</b><br>(0.63 to 2.49)<br>[OS-R1 resection Patients]  | -- per 1,000<br>(from -- to --) | ⊕⊕○○<br>Low | CRITICAL   |
|                                  |                   |              |               |              |             |                                                  | -                          | 0.0%             |                                                                 | -- per 1,000<br>(from -- to --) |             |            |
| <b>OS-N+ tumor Patients</b>      |                   |              |               |              |             |                                                  |                            |                  |                                                                 |                                 |             |            |
| 2                                | randomised trials | serious      | not serious   | not serious  | not serious | publication bias strongly suspected <sup>a</sup> | 212 participants           | 207 participants | <b>HR 0.99</b><br>(0.67 to 1.46)<br>[OS-N+ tumor Patients]      | -- per 1,000<br>(from -- to --) | ⊕⊕○○<br>Low | CRITICAL   |
|                                  |                   |              |               |              |             |                                                  | -                          | 0.0%             |                                                                 | -- per 1,000<br>(from -- to --) |             |            |

CI: confidence interval; HR: hazard Ratio

**Explanations**

a. There was no publication bias test for this conclusion

**Author(s):**  
**Question:** G+S-1 compared to S-1 for Survival and Toxicities  
**Setting:**  
**Bibliography:**

| Certainty assessment                            |                   |              |                      |              |                             |                                                                     | N <sub>e</sub> of patients |                 | Effect                                                              |                                                           | Certainty        | Importance |
|-------------------------------------------------|-------------------|--------------|----------------------|--------------|-----------------------------|---------------------------------------------------------------------|----------------------------|-----------------|---------------------------------------------------------------------|-----------------------------------------------------------|------------------|------------|
| N <sub>e</sub> of studies                       | Study design      | Risk of bias | Inconsistency        | Indirectness | Imprecision                 | Other considerations                                                | G+S-1                      | S-1             | Relative (95% CI)                                                   | Absolute (95% CI)                                         |                  |            |
| <b>All-cause mortality at 1 year</b>            |                   |              |                      |              |                             |                                                                     |                            |                 |                                                                     |                                                           |                  |            |
| 2                                               | randomised trials | serious      | serious <sup>a</sup> | not serious  | not serious                 | publication bias strongly suspected <sup>b</sup>                    | 76 participants            | 75 participants | <b>RR 0.61</b><br>(0.33 to 1.13)<br>[All-cause mortality at 1 year] | <b>0 fewer per 1,000</b><br>(from 0 fewer to 0 fewer)     | ⊕○○○<br>Very low |            |
|                                                 |                   |              |                      |              |                             |                                                                     | -                          | 0.0%            |                                                                     |                                                           |                  |            |
| <b>ORR(S-1 vs.G+S-1)</b>                        |                   |              |                      |              |                             |                                                                     |                            |                 |                                                                     |                                                           |                  |            |
| 2                                               | randomised trials | serious      | not serious          | not serious  | not serious                 | publication bias strongly suspected strong association <sup>b</sup> | 69 participants            | 71 participants | <b>RR 2.46</b><br>(1.27 to 4.75)<br>[ORR]                           | <b>0 fewer per 1,000</b><br>(from 0 fewer to 0 fewer)     | ⊕⊕⊕○<br>Moderate |            |
|                                                 |                   |              |                      |              |                             |                                                                     | -                          | 0.0%            |                                                                     |                                                           |                  |            |
| <b>Toxicities--Grade 1 - 4 Anaemia</b>          |                   |              |                      |              |                             |                                                                     |                            |                 |                                                                     |                                                           |                  |            |
| 2                                               | randomised trials | serious      | not serious          | not serious  | serious <sup>c</sup>        | publication bias strongly suspected <sup>b</sup>                    | 47/76 (61.8%)              | 36/75 (48.0%)   | <b>RR 1.26</b><br>(1.00 to 1.59)                                    | <b>125 more per 1,000</b><br>(from 0 fewer to 283 more)   | ⊕○○○<br>Very low |            |
| <b>Toxicities--Grade 1 - 4 Thrombocytopenia</b> |                   |              |                      |              |                             |                                                                     |                            |                 |                                                                     |                                                           |                  |            |
| 2                                               | randomised trials | serious      | not serious          | not serious  | not serious                 | publication bias strongly suspected strong association <sup>b</sup> | 31/76 (40.8%)              | 12/75 (16.0%)   | <b>RR 2.45</b><br>(1.39 to 4.32)                                    | <b>232 more per 1,000</b><br>(from 62 more to 531 more)   | ⊕⊕⊕○<br>Moderate |            |
| <b>Toxicities--Grade 1 - 4 Neutropenia</b>      |                   |              |                      |              |                             |                                                                     |                            |                 |                                                                     |                                                           |                  |            |
| 2                                               | randomised trials | serious      | not serious          | not serious  | not serious                 | publication bias strongly suspected strong association <sup>b</sup> | 59/76 (77.6%)              | 22/75 (29.3%)   | <b>RR 3.30</b><br>(1.04 to 10.50)                                   | <b>675 more per 1,000</b><br>(from 12 more to 1,000 more) | ⊕⊕⊕○<br>Moderate |            |
| <b>Toxicities--Febrile Neutropenia</b>          |                   |              |                      |              |                             |                                                                     |                            |                 |                                                                     |                                                           |                  |            |
| 2                                               | randomised trials | serious      | not serious          | not serious  | very serious <sup>c,d</sup> | publication bias strongly suspected <sup>b</sup>                    | 2/76 (2.6%)                | 0/75 (0.0%)     | <b>RR 2.97</b><br>(0.32 to 27.87)                                   | <b>0 fewer per 1,000</b><br>(from 0 fewer to 0 fewer)     | ⊕○○○<br>Very low |            |

CI: confidence interval; RR: risk ratio

**Explanations**

- a. The heterogeneity between the included studies was large
- b. Publication bias could not be assessed
- c. Sample size less than OIS
- d. The 95% confidence interval range is too large and contains invalid values
